# Supplementary material for: Fosfomycin removal and phosphorus recovery in a schorl/H2O2 system
Source: Royal Society of Chemistry journal article supplement (doi:10.1039/c6ra13637k), 2016-01-01
Supplement: c6ra13637k1.pdf [file c6ra13637k1.pdf]

Supporting Information

**Fosfomycin removal and phosphorus recovery in a schorl/H<sub>2</sub>O<sub>2</sub> system**

Jing Shi <sup>a</sup>, Danyang Yin <sup>b</sup>, Zhengwen Xu <sup>b,\*</sup>, Duanmei Song <sup>a</sup>, Feng Cao <sup>a</sup>

<sup>a</sup>School of Engineering, China Pharmaceutical University, Nanjing 211198, P.R.

China

<sup>b</sup>School of Environmental Science and Engineering, Nanjing University of

Information Science and Technology, Nanjing 210044, P.R. China

\*Corresponding author: Zhengwen Xu;

E-mail: [zwxu@nuist.edu.cn](mailto:zwxu@nuist.edu.cn);

## **Figures**

**Fig. S1.** The structure of fosfomicin sodium

**Fig. S2.** The relationship between the phosphorus data

**Fig. S3.** XRD analysis of the schorl

**Fig. S4.** FT-IR spectra of the schorl

**Fig. S5.** SEM (a) and EDS (b) analysis of the schorl

**Fig. S6.** The possible transformation pathways for the fosfomicin

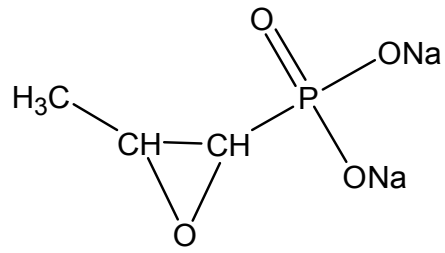

**Fig. S1:** The structure of fosfomicin sodium

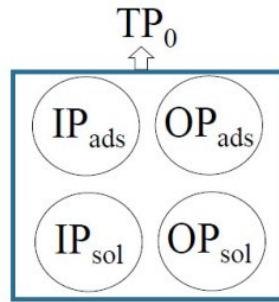

(a)

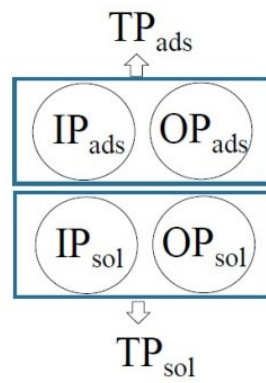

(b)

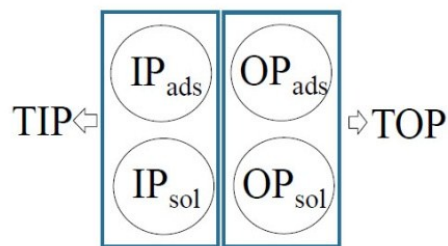

(c)

**Fig. S2.** The relationship between the phosphorus data

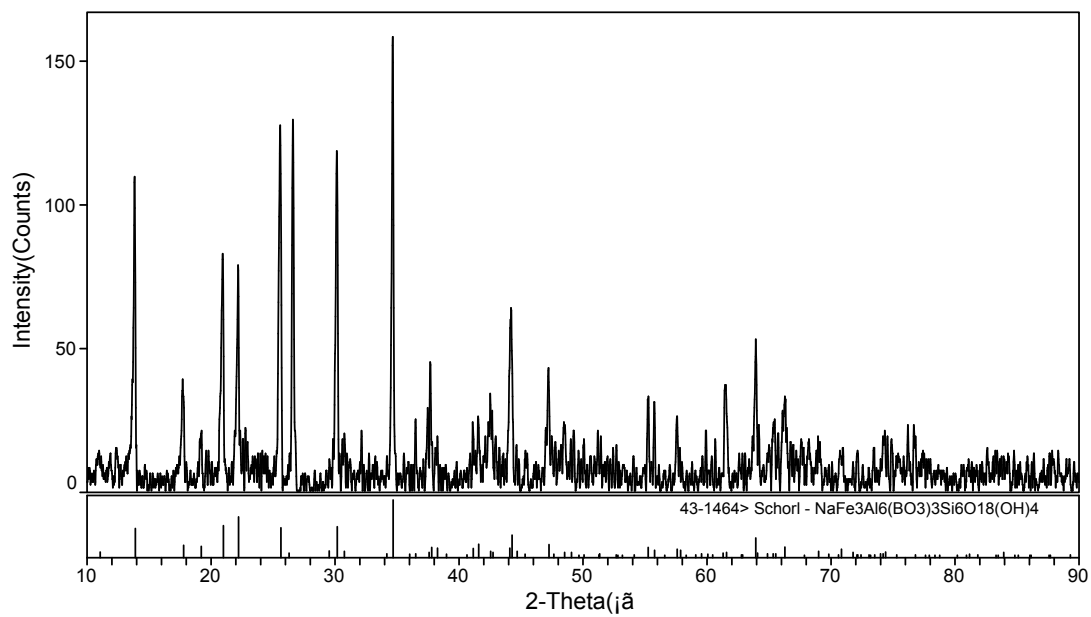

**Fig. S3: XRD analysis of the schorl**

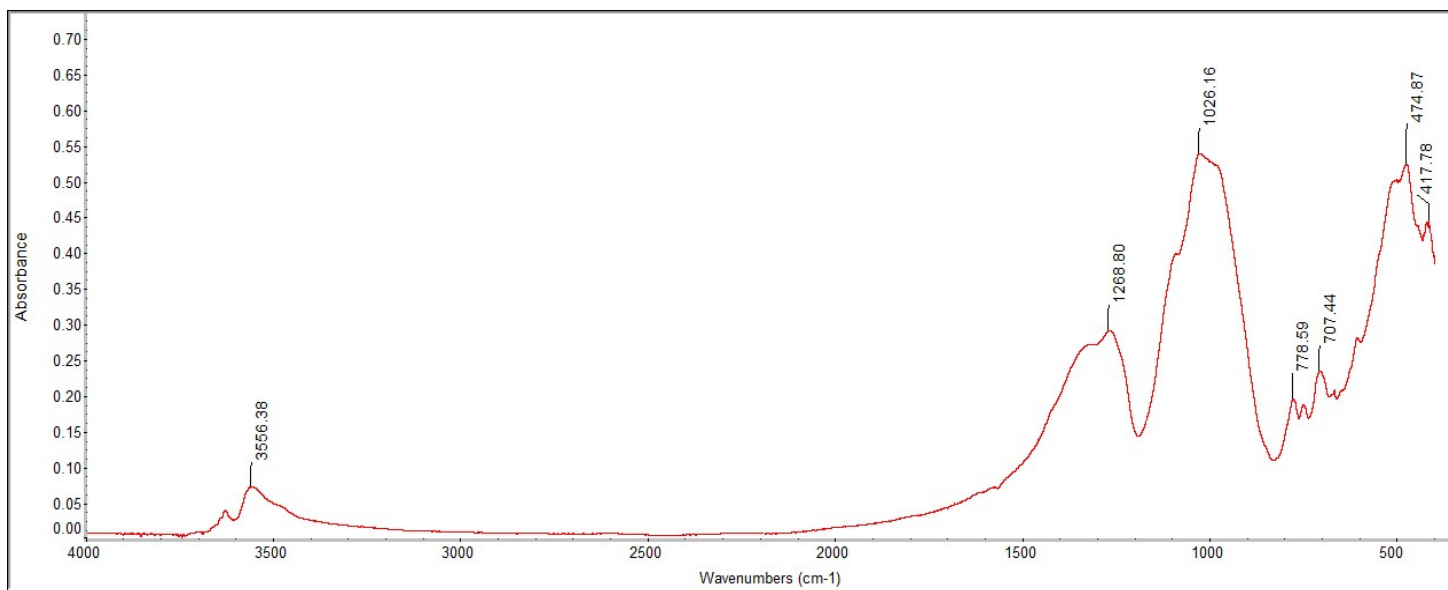

**Fig.S4: FT-IR spectra of the schorl**

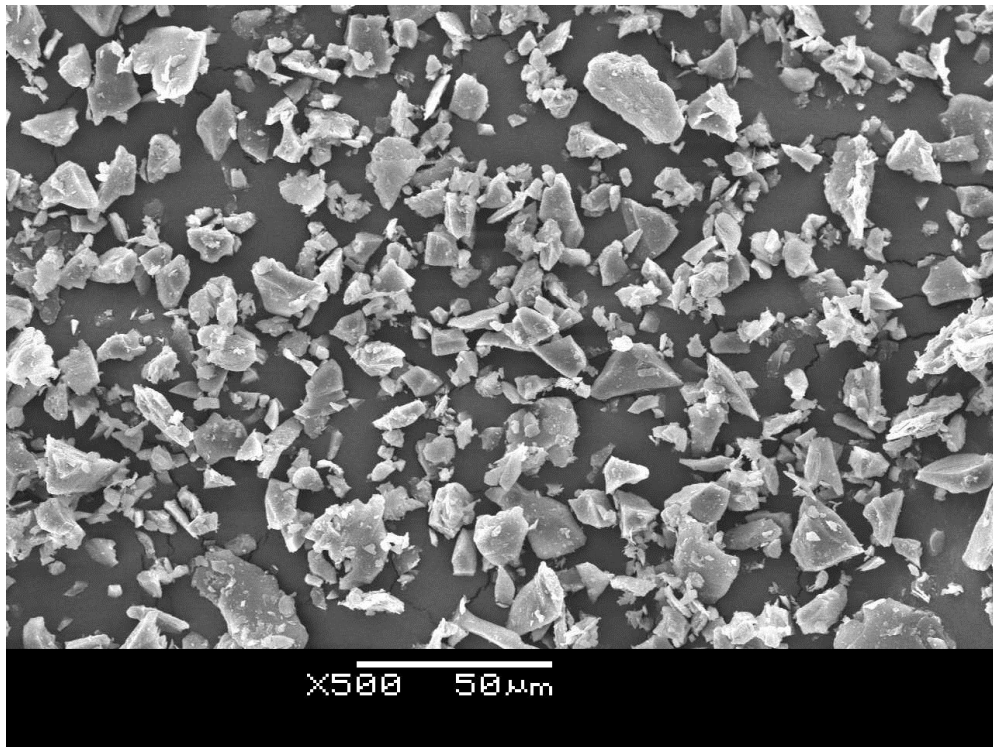

(a)

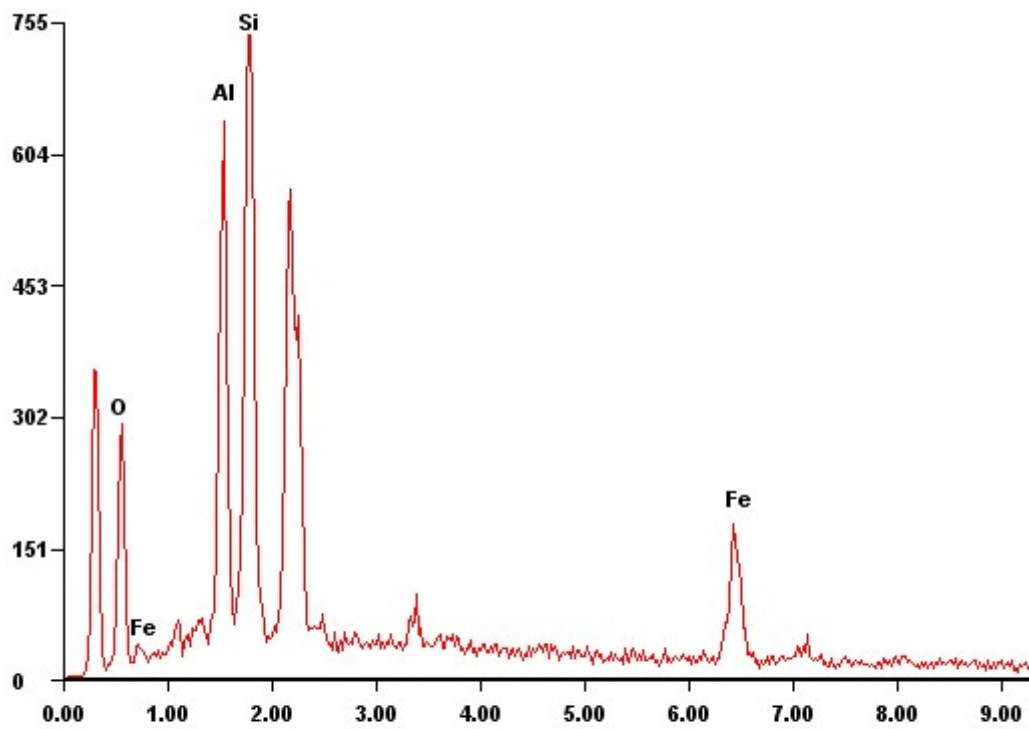

(b)

**Fig.S5: SEM (a) and EDS (b) analysis of the schorl**

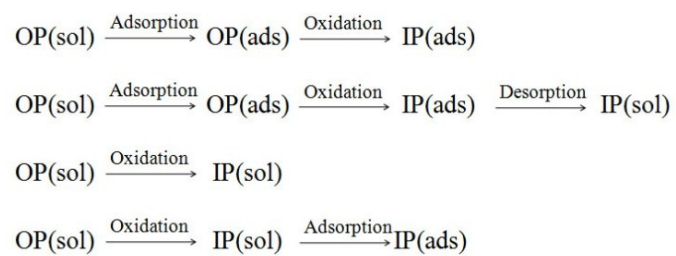

**Fig. S6. The possible transformation pathways for the fosfomicin**
